# Supplementary material for: Chromatin modification contributes to the expression divergence of three TaGS2 homoeologs in hexaploid wheat
Source: PubMed Central journal article supplement (PMC5353557; doi:10.1038/srep44677), 2017-03-16
Supplement: srep44677-s1.pdf [file srep44677-s1.pdf]

# **Chromatin modification contributes to the expression divergence of three *TaGS2* homoeologs in hexaploid wheat**

Wei Zhang <sup>a,b,1</sup>, Xiaoli Fan <sup>d,1</sup>, Yingjie Gao <sup>c,1</sup>, Lei Liu <sup>a,b</sup>, Lijing Sun <sup>e</sup>, Qiannan Su <sup>a,f</sup>, Jie Han <sup>a,f</sup>, Na Zhang <sup>a,f</sup>, Fa Cui <sup>a</sup>, Jun Ji <sup>a,b</sup>, Yiping Tong <sup>b</sup>, Junming Li <sup>a,b,2</sup>

<sup>a</sup> Center for Agricultural Resources Research, Institute of Genetics and Developmental Biology, Chinese Academy of Sciences, Shijiazhuang 050022, China

<sup>b</sup> State Key Laboratory of Plant Cell and Chromosome Engineering, Chinese Academy of Sciences, Beijing 100101, China

<sup>c</sup> Hebei Key Laboratory of Molecular and Cellular Biology, Hebei Normal University, Shijiazhuang 050024, China

<sup>d</sup> Chengdu Institute of Biology, Chinese Academy of Sciences, Chengdu 610041, China

<sup>e</sup> Institute of Cereal and Oil Crops, Hebei Academy of Agricultural and Forestry Sciences, Shijiazhuang 050035, China

<sup>f</sup> University of Chinese Academy of Sciences, Beijing 100049, China

<sup>1</sup> These authors contributed equally to this work.

<sup>2</sup> Address correspondence to [ljm@sjziam.ac.cn](mailto:ljm@sjziam.ac.cn).

Tel: +86-311-85887272

Fax: +86-311-85815093

# Supplementary Data

|              |                                                                                |                                                                 |                                              |                            |               |                             |                   |     |
|--------------|--------------------------------------------------------------------------------|-----------------------------------------------------------------|----------------------------------------------|----------------------------|---------------|-----------------------------|-------------------|-----|
| TMB02-AA.seq | ATGGCGCAGGCGGTGGTCCGGCGATGCACTGCCAGTGGGGC                                      | CGGGGGCAGGTCGGCCGTCGCCGGCAGGCGAGCCCG                            | CGCAGGGTGTGGGCGTCA                           | 100                        |               |                             |                   |     |
| TH02-SS.seq  | ATGGCGCAGGCGGTGGTCCGGCGATGCACTGCCAGTGGGGC                                      | CGGGGGCAGGTCGGCCGTCGCCGGCAGGCGAGCCCG                            | CGCAGGGTGTGGGCGTCA                           | 100                        |               |                             |                   |     |
| Z415-SS.seq  | ATGGCGCAGGCGGTGGTCCGGCGATGCACTGCCAGTGGGGC                                      | CGGGGGCAGGTCGGCCGTCGCCGGCAGGCGAGCCCG                            | CGCAGGGTGTGGGCGTCA                           | 100                        |               |                             |                   |     |
| Y199-DD.seq  | ATGGCGCAGGCGGTGGTCCGGCGATGCACTGCCAGTGGGGC                                      | CGGGGGCAGGTCGGCCGTCGCCGGCAGGCGAGCCCG                            | CGCAGGGTGTGGGCGTCA                           | 100                        |               |                             |                   |     |
| Consensus    | atggcgagggcggtgggtccggcgatgcactgccagtgggg                                      | cgggggcaggtcggccgctccggcgagggcagcccg                            | ggcaggggtgtgggcgctca                         |                            |               |                             |                   |     |
| TMB02-AA.seq | GGAGGACCGCCCGCCGCTCTGGTTCAAGTGTCTGCTCGCC                                       | CTGGCCCGGAGACCACCGGGTCCATCCAGAGGATGCAGCAGCTGCTCGACATGGACAC      | 200                                          |                            |               |                             |                   |     |
| TH02-SS.seq  | GGAGGACCGCCCGCCGCTCTGGTTCAAGTGTCTGCTCGCC                                       | CTGGCCCGGAGACCACCGGGTCCATCCAGAGGATGCAGCAGCTGCTCGACATGGACAC      | 200                                          |                            |               |                             |                   |     |
| Z415-SS.seq  | GGAGGACCGCCCGCCGCTCTGGTTCAAGTGTCTGCTCGCC                                       | CTGGCCCGGAGACCACCGGGTCCATCCAGAGGATGCAGCAGCTGCTCGACATGGACAC      | 200                                          |                            |               |                             |                   |     |
| Y199-DD.seq  | GGAGGACCGCCCGCCGCTCTGGTTCAAGTGTCTGCTCGCC                                       | CTGGCCCGGAGACCACCGGGTCCATCCAGAGGATGCAGCAGCTGCTCGACATGGACAC      | 200                                          |                            |               |                             |                   |     |
| Consensus    | ggagaccgcccgcgcccctcgggtcaagtgctgcctcggcccgagaccacggg                          | gtcatccagaggatgcagcagctgctcgacatggacac                          |                                              |                            |               |                             |                   |     |
| TMB02-AA.seq | CACGCCCTTACCAGCAAGATCATCGCCGAGTACATCTGGGTGGAGGATCTGGAATTGACCTCAG               | AGCAAAATCAAGGACGATTTCC                                          | AAAGCCAGTGGAG                                | 300                        |               |                             |                   |     |
| TH02-SS.seq  | CACGCCCTTACCAGCAAGATCATCGCCGAGTACATCTGGGTGGAGGATCTGGAATTGACCTCAG               | AGCAAAATCAAGGACGATTTCC                                          | AAAGCCAGTGGAG                                | 300                        |               |                             |                   |     |
| Z415-SS.seq  | CACGCCCTTACCAGCAAGATCATCGCCGAGTACATCTGGGTGGAGGATCTGGAATTGACCTCAG               | AGCAAAATCAAGGACGATTTCC                                          | AAAGCCAGTGGAG                                | 300                        |               |                             |                   |     |
| Y199-DD.seq  | CACGCCCTTACCAGCAAGATCATCGCCGAGTACATCTGGGTGGAGGATCTGGAATTGACCTCAG               | AGCAAAATCAAGGACGATTTCC                                          | AAAGCCAGTGGAG                                | 300                        |               |                             |                   |     |
| Consensus    | cacgcccttaccagcaagatcatcggcgagtagctgggtggaggtctggaattgacctcag                  | agcaaatcaaggacgatttc                                            | aagccagtggag                                 |                            |               |                             |                   |     |
| TMB02-AA.seq | GACCCCTCAGAGTACCCAAATGGAACACTACGACGGATCGAGCAGCGG                               | CAGGCTCCTGGAGAAGACAGTGAAGTATCCTATACCCACAGGC                     | ATATTCA                                      | 400                        |               |                             |                   |     |
| TH02-SS.seq  | GACCCCTCAGAGTACCCAAATGGAACACTACGACGGATCGAGCAGCGG                               | CAGGCTCCTGGAGAAGACAGTGAAGTATCCTATACCCACAGGC                     | ATATTCA                                      | 400                        |               |                             |                   |     |
| Z415-SS.seq  | GACCCCTCAGAGTACCCAAATGGAACACTACGACGGATCGAGCAGCGG                               | CAGGCTCCTGGAGAAGACAGTGAAGTATCCTATACCCACAGGC                     | ATATTCA                                      | 400                        |               |                             |                   |     |
| Y199-DD.seq  | GACCCCTCAGAGTACCCAAATGGAACACTACGACGGATCGAGCAGCGG                               | CAGGCTCCTGGAGAAGACAGTGAAGTATCCTATACCCACAGGC                     | ATATTCA                                      | 400                        |               |                             |                   |     |
| Consensus    | gaccctcagagctacc                                                               | aaatggaactacgacggatcgagcacaagg                                  | caggctcctggagaagacagtggaagtcatcctataccacaggc | atattca                    |               |                             |                   |     |
| TMB02-AA.seq | AGGACCCATTCCGAGGAGGCAACAACATCTGGTTATCTGTGACACCTACACGCCACAAGGGGAACCCATCCCTAC    | AAACAA                                                          | CGACACATGGTGCACA                             | 500                        |               |                             |                   |     |
| TH02-SS.seq  | AGGACCCATTCCGAGGAGGCAACAACATCTGGTTATCTGTGACACCTACACGCCACAAGGGGAACCCATCCCTAC    | AAACAA                                                          | CGACACATGGTGCACA                             | 500                        |               |                             |                   |     |
| Z415-SS.seq  | AGGACCCATTCCGAGGAGGCAACAACATCTGGTTATCTGTGACACCTACACGCCACAAGGGGAACCCATCCCTAC    | AAACAA                                                          | CGACACATGGTGCACA                             | 500                        |               |                             |                   |     |
| Y199-DD.seq  | AGGACCCATTCCGAGGAGGCAACAACATCTGGTTATCTGTGACACCTACACGCCACAAGGGGAACCCATCCCTAC    | AAACAA                                                          | CGACACATGGTGCACA                             | 500                        |               |                             |                   |     |
| Consensus    | aggaccattccgagggagggcaacaacat                                                  | ctggttatctgtgacacctacacgccacaaggggaacccatccctac                 | aacaa                                        | cgacacatggctgcaca          |               |                             |                   |     |
| TMB02-AA.seq | AATCTTACGTCAGCCCAAGGTCACTCTCAAGTGCCATGGTTGGAATCGAACAGGAGTACACTCTGATCGAGAGGGATG | CAACTGGCCCTTTGGCTGG                                             | 600                                          |                            |               |                             |                   |     |
| TH02-SS.seq  | AATCTTACGTCAGCCCAAGGTCACTCTCAAGTGCCATGGTTGGAATCGAACAGGAGTACACTCTGATCGAGAGGGATG | CAACTGGCCCTTTGGCTGG                                             | 600                                          |                            |               |                             |                   |     |
| Z415-SS.seq  | AATCTTACGTCAGCCCAAGGTCACTCTCAAGTGCCATGGTTGGAATCGAACAGGAGTACACTCTGATCGAGAGGGATG | CAACTGGCCCTTTGGCTGG                                             | 600                                          |                            |               |                             |                   |     |
| Y199-DD.seq  | AATCTTACGTCAGCCCAAGGTCACTCTCAAGTGCCATGGTTGGAATCGAACAGGAGTACACTCTGATCGAGAGGGATG | CAACTGGCCCTTTGGCTGG                                             | 600                                          |                            |               |                             |                   |     |
| Consensus    | aatctcagtcagcccaaggtcactc                                                      | caagtgccatgggttggaaatcgaaacagggatgacctctgatcgagagggatg          | aactggccctttggctgg                           |                            |               |                             |                   |     |
| TMB02-AA.seq | CTGTGGAGGGTA                                                                   | CCTGGCCCCCAGGGTCCATACTACTGCGC                                   | GTAGGATCAGACAA                               | TCATTGGCCG                 | SACAT         | TCG                         | GATGCTCACTACAAGGC | 700 |
| TH02-SS.seq  | CTGTGGAGGGTA                                                                   | CCTGGCCCCCAGGGTCCATACTACTGCGC                                   | GTAGGATCAGACAA                               | TCATTGGCCG                 | SACAT         | TCG                         | GATGCTCACTACAAGGC | 700 |
| Z415-SS.seq  | CTGTGGAGGGTA                                                                   | CCTGGCCCCCAGGGTCCATACTACTGCGC                                   | GTAGGATCAGACAA                               | TCATTGGCCG                 | SACAT         | TCG                         | GATGCTCACTACAAGGC | 700 |
| Y199-DD.seq  | CTGTGGAGGGTA                                                                   | CCTGGCCCCCAGGGTCCATACTACTGCGC                                   | GTAGGATCAGACAA                               | TCATTGGCCG                 | SACAT         | TCG                         | GATGCTCACTACAAGGC | 700 |
| Consensus    | ctgtggagggta                                                                   | cctggccccagggttccataactactgctgc                                 | gtaggatcagacaa                               | tcaattggccg                | gacat         | tc                          | gatgctcactacaaggc | t   |
| TMB02-AA.seq | GCCTTTACGCTGGAATTGAAATCAGTGGAAACAACCGGGAGGTCATGCTGGTTCAGTGGGAGTACACAGGTTGG     | CTAGCGTTGGTATTGATG                                              | AGGAGA                                       | 800                        |               |                             |                   |     |
| TH02-SS.seq  | GCCTTTACGCTGGAATTGAAATCAGTGGAAACAACCGGGAGGTCATGCTGGTTCAGTGGGAGTACACAGGTTGG     | CTAGCGTTGGTATTGATG                                              | AGGAGA                                       | 800                        |               |                             |                   |     |
| Z415-SS.seq  | GCCTTTACGCTGGAATTGAAATCAGTGGAAACAACCGGGAGGTCATGCTGGTTCAGTGGGAGTACACAGGTTGG     | CTAGCGTTGGTATTGATG                                              | AGGAGA                                       | 800                        |               |                             |                   |     |
| Y199-DD.seq  | GCCTTTACGCTGGAATTGAAATCAGTGGAAACAACCGGGAGGTCATGCTGGTTCAGTGGGAGTACACAGGTTGG     | CTAGCGTTGGTATTGATG                                              | AGGAGA                                       | 800                        |               |                             |                   |     |
| Consensus    | gcctttacgc                                                                     | ggaattgaaatcagtggaacaacacgggaggtcatgctggctcagtgaggatgaccaggttgg | cctagcgttggattatgagc                         | ggaga                      |               |                             |                   |     |
| TMB02-AA.seq | TCACATATGGGCTTCAAGATACATTCCTCGAGAGAATCAGGAGGAC                                 | GCTGGAGTCTGTGCTCAC                                              | TTTGACCC                                     | AAACCAATCCAGGGTACTGGAATGGA | 900           |                             |                   |     |
| TH02-SS.seq  | TCACATATGGGCTTCAAGATACATTCCTCGAGAGAATCAGGAGGAC                                 | GCTGGAGTCTGTGCTCAC                                              | TTTGACCC                                     | AAACCAATCCAGGGTACTGGAATGGA | 900           |                             |                   |     |
| Z415-SS.seq  | TCACATATGGGCTTCAAGATACATTCCTCGAGAGAATCAGGAGGAC                                 | GCTGGAGTCTGTGCTCAC                                              | TTTGACCC                                     | AAACCAATCCAGGGTACTGGAATGGA | 900           |                             |                   |     |
| Y199-DD.seq  | TCACATATGGGCTTCAAGATACATTCCTCGAGAGAATCAGGAGGAC                                 | GCTGGAGTCTGTGCTCAC                                              | TTTGACCC                                     | AAACCAATCCAGGGTACTGGAATGGA | 900           |                             |                   |     |
| Consensus    | tcacatatgggcttcaagatatactctcgagagaatcaggagacg                                  | gctgg                                                           | gt                                           | gtgctcac                   | tttgacc       | aaaccaatccagggtagctggaatgga |                   |     |
| TMB02-AA.seq | CTGTGCTGCACACAATTACAGCACCTTGAGCATGCGT                                          | SAGGATGGAGGTTTCGACGTGATCAAGAAGGCAATCCT                          | CAACCTTTCAC                                  | TCGCCATGAT                 | 1000          |                             |                   |     |
| TH02-SS.seq  | CTGTGCTGCACACAATTACAGCACCTTGAGCATGCGT                                          | SAGGATGGAGGTTTCGACGTGATCAAGAAGGCAATCCT                          | CAACCTTTCAC                                  | TCGCCATGAT                 | 1000          |                             |                   |     |
| Z415-SS.seq  | CTGTGCTGCACACAATTACAGCACCTTGAGCATGCGT                                          | SAGGATGGAGGTTTCGACGTGATCAAGAAGGCAATCCT                          | CAACCTTTCAC                                  | TCGCCATGAT                 | 1000          |                             |                   |     |
| Y199-DD.seq  | CTGTGCTGCACACAATTACAGCACCTTGAGCATGCGT                                          | SAGGATGGAGGTTTCGACGTGATCAAGAAGGCAATCCT                          | CAACCTTTCAC                                  | TCGCCATGAT                 | 1000          |                             |                   |     |
| Consensus    | gctgctgcccacacaattacagcac                                                      | ttgagcatgctg                                                    | gaggtatggaggttttcgacgtgatcaagaagggcaatcct    | aacctttcact                | cgccatga      | t                           |                   |     |
| TMB02-AA.seq | TGCACATAGCCGATATGTTGAAGGAAACGAAACGGAGG                                         | TGACAGGCTTACATGAGACAGTAGCATATCAGACTTCTCATGGGG                   | CTC                                          | CAACCGTGG                  | 1100          |                             |                   |     |
| TH02-SS.seq  | TGCACATAGCCGATATGTTGAAGGAAACGAAACGGAGG                                         | TGACAGGCTTACATGAGACAGTAGCATATCAGACTTCTCATGGGG                   | CTC                                          | CAACCGTGG                  | 1100          |                             |                   |     |
| Z415-SS.seq  | TGCACATAGCCGATATGTTGAAGGAAACGAAACGGAGG                                         | TGACAGGCTTACATGAGACAGTAGCATATCAGACTTCTCATGGGG                   | CTC                                          | CAACCGTGG                  | 1100          |                             |                   |     |
| Y199-DD.seq  | TGCACATAGCCGATATGTTGAAGGAAACGAAACGGAGG                                         | TGACAGGCTTACATGAGACAGTAGCATATCAGACTTCTCATGGGG                   | CTC                                          | CAACCGTGG                  | 1100          |                             |                   |     |
| Consensus    | tgcacatagccgatatggtgaaggaacgaacggaggtg                                         | tgacaggcttacatgagacagtagcatatcagacttctcatgggg                   | ctc                                          | caac                       | cgctgg        |                             |                   |     |
| TMB02-AA.seq | CTGCTCATTCGTTGGGGCAGAGSACTGAGGCAAGGGCAAAGGATACCTGGAGGA                         | CGTCGCCCGGC                                                     | TCGAACATGGACCC                               | TACACCGTACGGGG             | 1200          |                             |                   |     |
| TH02-SS.seq  | CTGCTCATTCGTTGGGGCAGAGSACTGAGGCAAGGGCAAAGGATACCTGGAGGA                         | CGTCGCCCGGC                                                     | TCGAACATGGACCC                               | TACACCGTACGGGG             | 1200          |                             |                   |     |
| Z415-SS.seq  | CTGCTCATTCGTTGGGGCAGAGSACTGAGGCAAGGGCAAAGGATACCTGGAGGA                         | CGTCGCCCGGC                                                     | TCGAACATGGACCC                               | TACACCGTACGGGG             | 1200          |                             |                   |     |
| Y199-DD.seq  | CTGCTCATTCGTTGGGGCAGAGSACTGAGGCAAGGGCAAAGGATACCTGGAGGA                         | CGTCGCCCGGC                                                     | TCGAACATGGACCC                               | TACACCGTACGGGG             | 1200          |                             |                   |     |
| Consensus    | ctgctcattcgttggggcagag                                                         | sactgaggcaagggcaaaaggatacctggagga                               | cgtcgcccggc                                  | tccaacatggacc              | tacacctgacggg |                             |                   |     |
| TMB02-AA.seq | CTGCTGGCCGAGACCAGATCCTGTGGGAGCCGACCTC                                          | SAGGCGGAGGCCCTCGCTGCCAAGAAGTGGCGCTGAAGGTATGA                    | 1284                                         |                            |               |                             |                   |     |
| TH02-SS.seq  | CTGCTGGCCGAGACCAGATCCTGTGGGAGCCGACCTC                                          | SAGGCGGAGGCCCTCGCTGCCAAGAAGTGGCGCTGAAGGTATGA                    | 1284                                         |                            |               |                             |                   |     |
| Z415-SS.seq  | CTGCTGGCCGAGACCAGATCCTGTGGGAGCCGACCTC                                          | SAGGCGGAGGCCCTCGCTGCCAAGAAGTGGCGCTGAAGGTATGA                    | 1284                                         |                            |               |                             |                   |     |
| Y199-DD.seq  | CTGCTGGCCGAGACCAGATCCTGTGGGAGCCGACCTC                                          | SAGGCGGAGGCCCTCGCTGCCAAGAAGTGGCGCTGAAGGTATGA                    | 1284                                         |                            |               |                             |                   |     |
| Consensus    | ctgctggc                                                                       | gagaccagatcctgtgggagccgacct                                     | saggcgaggccctcgctgccaaagagctggcgctgaaggtatga |                            |               |                             |                   |     |

Fig S1. cDNA sequences alignment of TaGS2 homoeologs in the progenitor species .



|                  |                                                                                                       |      |
|------------------|-------------------------------------------------------------------------------------------------------|------|
| TaGS2-A-cDNA.seq | ATGGCCAGGCGGTGGTCCCGCGATGCAGTCCAGGTGGCGTCCGGGCGAGTGGCCGTCCTCCCGCGAGGCAGCCCGGGGAGGGTGTGGGCGTCA         | 100  |
| TaGS2-B-cDNA.seq | ATGGCCAGGCGGTGGTCCCGCGATGCAGTCCAGGTGGCGTCCGGGCGAGTGGCCGTCCTCCCGCGAGGCAGCCCGGGGAGGGTGTGGGCGTCA         | 100  |
| TaGS2-D-cDNA.seq | ATGGCCAGGCGGTGGTCCCGCGATGCAGTCCAGGTGGCGTCCGGGCGAGTGGCCGTCCTCCCGCGAGGCAGCCCGGGGAGGGTGTGGGCGTCA         | 100  |
| Consensus        | atggccagggcgggtggtgcccgcgatgcagtgccaggtggcgtccgggaggtggccgtcctcccgcgaggcagcccggggaggggtgtgggcgctca    |      |
| TaGS2-A-cDNA.seq | GGAGGACCCCGCGCCACTCCCGCTTCAAGGTGCTGGCCCTCGGCCCGGAGACCACCGGCGTATCCAGAGGATGCAGCAGCTGCTGCAGATGGACAC      | 200  |
| TaGS2-B-cDNA.seq | GGAGGACCCCGCGCCACTCCCGCTTCAAGGTGCTGGCCCTCGGCCCGGAGACCACCGGCGTATCCAGAGGATGCAGCAGCTGCTGCAGATGGACAC      | 200  |
| TaGS2-D-cDNA.seq | GGAGGACCCCGCGCCACTCCCGCTTCAAGGTGCTGGCCCTCGGCCCGGAGACCACCGGCGTATCCAGAGGATGCAGCAGCTGCTGCAGATGGACAC      | 200  |
| Consensus        | ggaggaccgcccgcgcaactccggttcaaggtgctggccctcgcccggagaccacggcgctcatccagaggatgcagcagctgctgcagatggacac     |      |
| TaGS2-A-cDNA.seq | CACGCCCTCACCAGCAAGATCATCGCCGAGTACATCTGGTGGAGGATCTGGAATTGACCTCAGAGCAAAATCAAGGACGATTTGAAGCCAGTGGAG      | 300  |
| TaGS2-B-cDNA.seq | CACGCCCTCACCAGCAAGATCATCGCCGAGTACATCTGGTGGAGGATCTGGAATTGACCTCAGAGCAAAATCAAGGACGATTTGAAGCCAGTGGAG      | 300  |
| TaGS2-D-cDNA.seq | CACGCCCTCACCAGCAAGATCATCGCCGAGTACATCTGGTGGAGGATCTGGAATTGACCTCAGAGCAAAATCAAGGACGATTTGAAGCCAGTGGAG      | 300  |
| Consensus        | cagcccttcaccgacaagatcatcgccgagtagatctgggtggaggatctggaattgacctcagaagcaaatcaaggacgatttcgaagccagtgag     |      |
| TaGS2-A-cDNA.seq | GACCCCTCAGAGCTACCAAAATGAAATTTAGACGGATCGAGCACGGCCAGGCTCTGGAGAAGACAGTGAAGTCATCTATACCCACAGGCCATATTTCA    | 400  |
| TaGS2-B-cDNA.seq | GACCCCTCAGAGCTACCAAAATGAAATTTAGACGGATCGAGCACGGCCAGGCTCTGGAGAAGACAGTGAAGTCATCTATACCCACAGGCCATATTTCA    | 400  |
| TaGS2-D-cDNA.seq | GACCCCTCAGAGCTACCAAAATGAAATTTAGACGGATCGAGCACGGCCAGGCTCTGGAGAAGACAGTGAAGTCATCTATACCCACAGGCCATATTTCA    | 400  |
| Consensus        | gacccctcagagctaccgaaatggaactagacggatcgagcacaggcgaggctcctggagaagacagtgaaagtcaictctataccacagggccatattca |      |
| TaGS2-A-cDNA.seq | AGGACCCATCCGAGGAGGCACAACATCTGGTTATCTGTGACACCTACAGCCACAAAGGGGAACCCATCCCTACTAAACAACGACACATGGCTGCACA     | 500  |
| TaGS2-B-cDNA.seq | AGGACCCATCCGAGGAGGCACAACATCTGGTTATCTGTGACACCTACAGCCACAAAGGGGAACCCATCCCTACTAAACAACGACACATGGCTGCACA     | 500  |
| TaGS2-D-cDNA.seq | AGGACCCATCCGAGGAGGCACAACATCTGGTTATCTGTGACACCTACAGCCACAAAGGGGAACCCATCCCTACTAAACAACGACACATGGCTGCACA     | 500  |
| Consensus        | aggaccatccgaggaggcaacaacatctggttatctgtgacacctacagccacaaggggaacccatccctactaacaagcgacacatggctgcaca      |      |
| TaGS2-A-cDNA.seq | AATCTTCAGTGAACCAAGGTCACTGCACAAGTCCATGGTTTGGAAATCGAACAGGAGTACACTCTGATGCAGAGGGATGTGAACCTGGCTCTTTGGCTGG  | 600  |
| TaGS2-B-cDNA.seq | AATCTTCAGTGAACCAAGGTCACTGCACAAGTCCATGGTTTGGAAATCGAACAGGAGTACACTCTGATGCAGAGGGATGTGAACCTGGCTCTTTGGCTGG  | 600  |
| TaGS2-D-cDNA.seq | AATCTTCAGTGAACCAAGGTCACTGCACAAGTCCATGGTTTGGAAATCGAACAGGAGTACACTCTGATGCAGAGGGATGTGAACCTGGCTCTTTGGCTGG  | 600  |
| Consensus        | aatcttcagtgacccaaggtcactgcacaagtgccatggtttggaatcgaaacaggagtagactctgatgcagagggatgtagaactggcctcttggctgg |      |
| TaGS2-A-cDNA.seq | CCTGTTGGAGGTTACCTGGCCCGAGGGTCCATCTACTCGCCCGTAGGATCAGACAAGTCATTGGCCGTGACATATCGATGCTCACTACAAGGCT        | 700  |
| TaGS2-B-cDNA.seq | CCTGTTGGAGGTTACCTGGCCCGAGGGTCCATCTACTCGCCCGTAGGATCAGACAAGTCATTGGCCGTGACATATCGATGCTCACTACAAGGCT        | 700  |
| TaGS2-D-cDNA.seq | CCTGTTGGAGGTTACCTGGCCCGAGGGTCCATCTACTCGCCCGTAGGATCAGACAAGTCATTGGCCGTGACATATCGATGCTCACTACAAGGCT        | 700  |
| Consensus        | cctgttggagggtaccctggcccaggggtccatctactgcccgtaggatcagacaagtcatltagccgtgacatccgatgctcaactacaaggct       |      |
| TaGS2-A-cDNA.seq | GCCTTACCGCGGAATGAAATCAGTGAACAACGGGAGGTTCATGCTGTCAGTGGAGTACCAGGTTGGACCTTAGGCTTGGTATTGATGCCGGAGA        | 800  |
| TaGS2-B-cDNA.seq | GCCTTACCGCGGAATGAAATCAGTGAACAACGGGAGGTTCATGCTGTCAGTGGAGTACCAGGTTGGACCTTAGGCTTGGTATTGATGCCGGAGA        | 800  |
| TaGS2-D-cDNA.seq | GCCTTACCGCGGAATGAAATCAGTGAACAACGGGAGGTTCATGCTGTCAGTGGAGTACCAGGTTGGACCTTAGGCTTGGTATTGATGCCGGAGA        | 800  |
| Consensus        | gccttacggggaatgaaatcagtgaaacaacgggaggtcatgctggtcagtgaggtagaccaggttggacctagcgttggatitgatgcccggaga      |      |
| TaGS2-A-cDNA.seq | CCACATATGGCTTCAAGATACATCTCGAGAGAATCAGGAGCAAGCTGGTGTGCTGCTACCCTTGACCAAAAACCAATCCAGGGTGACTGGAATGGA      | 900  |
| TaGS2-B-cDNA.seq | CCACATATGGCTTCAAGATACATCTCGAGAGAATCAGGAGCAAGCTGGTGTGCTGCTACCCTTGACCAAAAACCAATCCAGGGTGACTGGAATGGA      | 900  |
| TaGS2-D-cDNA.seq | CCACATATGGCTTCAAGATACATCTCGAGAGAATCAGGAGCAAGCTGGTGTGCTGCTACCCTTGACCAAAAACCAATCCAGGGTGACTGGAATGGA      | 900  |
| Consensus        | ccacatattggcttcaagatcatctcgagagaatcaggagcaagctggtgtggtgctcacccttgaccaaaaaccaatccagggtagctggaatgga     |      |
| TaGS2-A-cDNA.seq | GCTGGCTGCCACAAAATACAGTACATGAGCATCCCGAATGAGGAGTTTGCAGCTGATCAAGAAGGCAATCTGAACCTTTCACTTCGGCATGACT        | 1000 |
| TaGS2-B-cDNA.seq | GCTGGCTGCCACAAAATACAGTACATGAGCATCCCGAATGAGGAGTTTGCAGCTGATCAAGAAGGCAATCTGAACCTTTCACTTCGGCATGACT        | 1000 |
| TaGS2-D-cDNA.seq | GCTGGCTGCCACAAAATACAGTACATGAGCATCCCGAATGAGGAGTTTGCAGCTGATCAAGAAGGCAATCTGAACCTTTCACTTCGGCATGACT        | 1000 |
| Consensus        | gctggctgccacaaaattacagtagcatcccgaaatgagagtttgcagctgatcaagaaggcaatctgaacctttcacttcggcatgact            |      |
| TaGS2-A-cDNA.seq | TGCACATAGCCGCATATGTTGAAGGAAACGACGGAGCTGACAGGGCTACAGGAGACAGTACATTTAGACTTCTCATGGGCTGTCCGAACTGTGG        | 1100 |
| TaGS2-B-cDNA.seq | TGCACATAGCCGCATATGTTGAAGGAAACGACGGAGCTGACAGGGCTACAGGAGACAGTACATTTAGACTTCTCATGGGCTGTCCGAACTGTGG        | 1100 |
| TaGS2-D-cDNA.seq | TGCACATAGCCGCATATGTTGAAGGAAACGACGGAGCTGACAGGGCTACAGGAGACAGTACATTTAGACTTCTCATGGGCTGTCCGAACTGTGG        | 1100 |
| Consensus        | tgcacatagccgatattggtgaaggaaacgacggaggttgacagggctacaggagacagtagcatttagacttctcatgggctgtccgaaactgtgg     |      |
| TaGS2-A-cDNA.seq | CTGCTCTATTCTGTGGCCGAGACCGGAGGCAAAAGGCAAAAGGATACCTGGAGGACCGTCCGCCGGCTCGAACATGGACCCATACACCGTGACGGCG     | 1200 |
| TaGS2-B-cDNA.seq | CTGCTCTATTCTGTGGCCGAGACCGGAGGCAAAAGGCAAAAGGATACCTGGAGGACCGTCCGCCGGCTCGAACATGGACCCATACACCGTGACGGCG     | 1200 |
| TaGS2-D-cDNA.seq | CTGCTCTATTCTGTGGCCGAGACCGGAGGCAAAAGGCAAAAGGATACCTGGAGGACCGTCCGCCGGCTCGAACATGGACCCATACACCGTGACGGCG     | 1200 |
| Consensus        | ctgctctattctgtggccgagaccggagggcaaaaggcaaaaggatacctggaggacctcgcccggcgtcgaacatggaccctacacctgacggcg      |      |
| TaGS2-A-cDNA.seq | CTGCTGGCCGAGACACGATCCTGTGGAGCCGACCTCGAGGCCGAGGCCCTCGTCCCAAGAAGCTGGCGCTGAAGGTATGA                      | 1284 |
| TaGS2-B-cDNA.seq | CTGCTGGCCGAGACACGATCCTGTGGAGCCGACCTCGAGGCCGAGGCCCTCGTCCCAAGAAGCTGGCGCTGAAGGTATGA                      | 1284 |
| TaGS2-D-cDNA.seq | CTGCTGGCCGAGACACGATCCTGTGGAGCCGACCTCGAGGCCGAGGCCCTCGTCCCAAGAAGCTGGCGCTGAAGGTATGA                      | 1284 |
| Consensus        | ctgctggccgagaccagatcctgtggagcccgacctcgaggccgaggccctcgctgccaaagactggcgctgaaggatgga                     |      |

Fig S3. Sequence alignment of the cDNA sequences of *TaGS2-A*, *TaGS2-B* and *TaGS2-D* in hexaploid wheat

Kn9204.



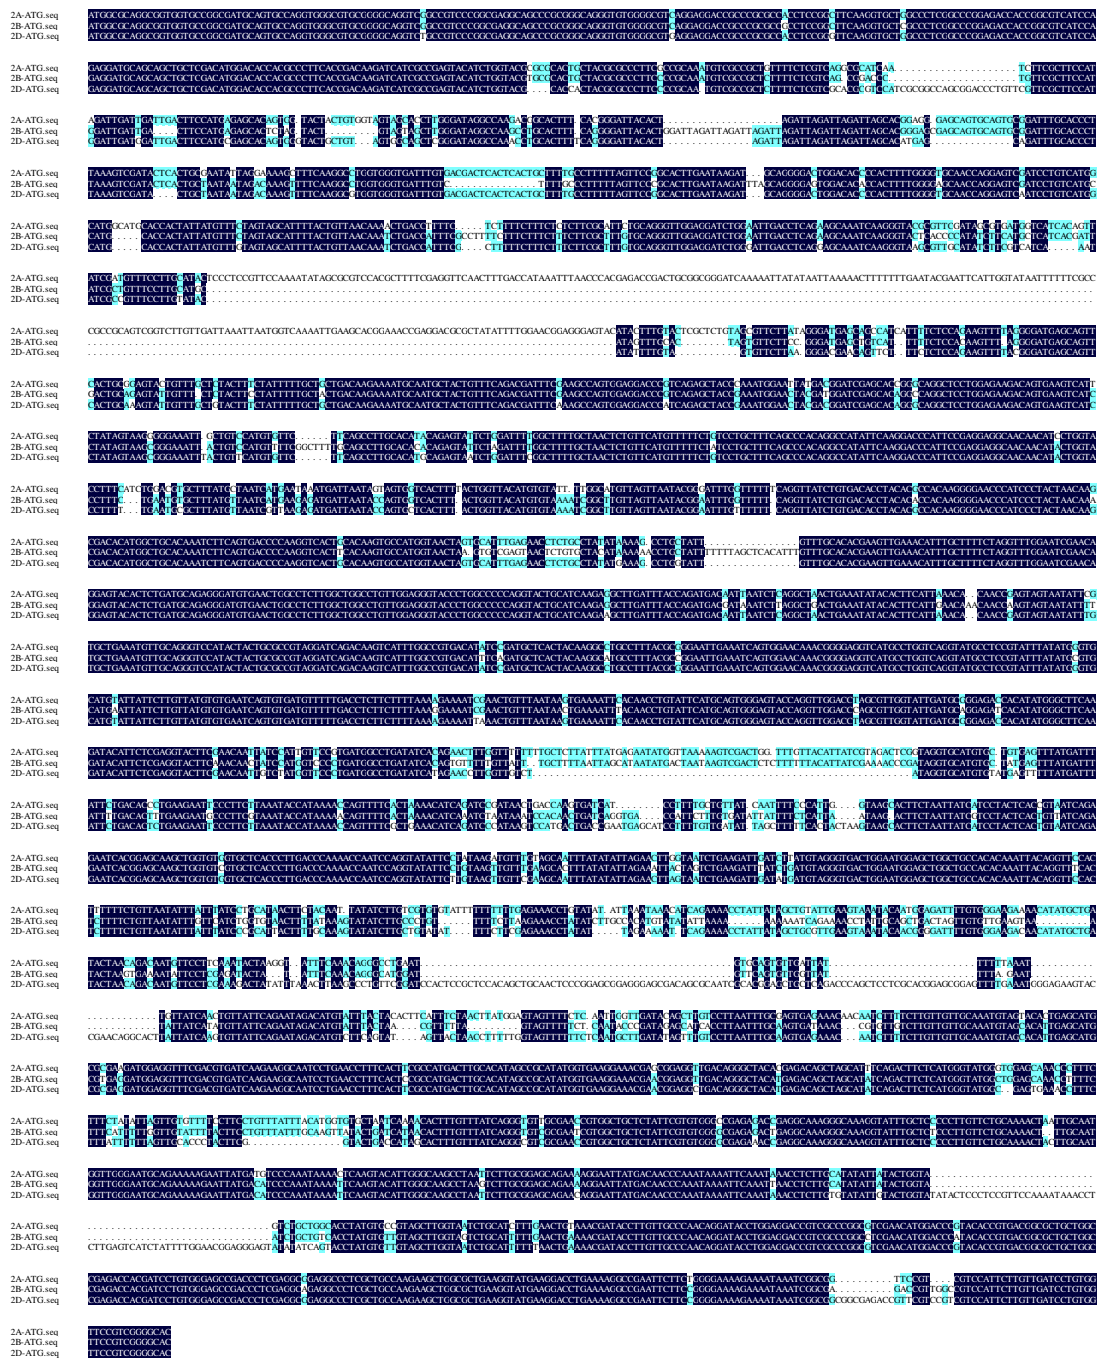

Fig S5. Sequence alignment of the DNA sequences of TaGS2-A, TaGS2-B and TaGS2-D in hexaploid wheat Kn9204.

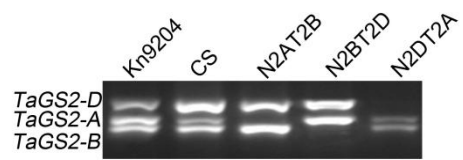

**Fig S6.** Chromosome mapping of the three *TaGS2* homoeologous genes in Chinese Spring (CS) nulli-tetrasomic lines. The line names specify which chromosomes are present (e.g., N2AT2B is nulli-2A tetra-2B). Kn9204, wild-type plant. The genomic origin of the PCR products is indicated on the left.

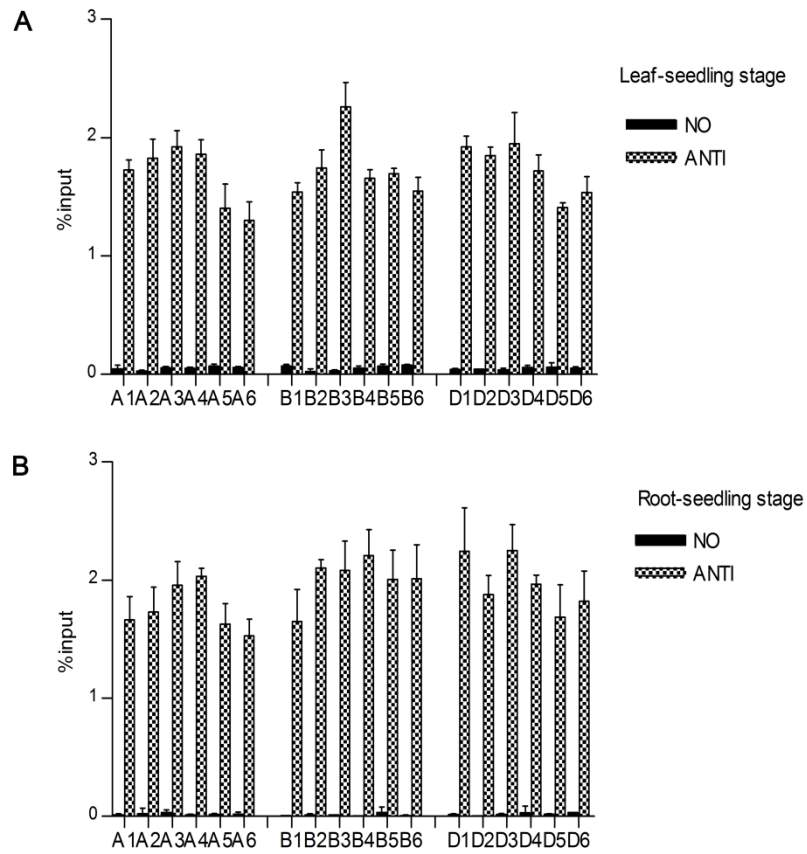

**Fig S7.** ChIP with anti-H3K9me2 antibodies to determine the levels of H3K9me3 at *TaGS2* in WT.

**(A)** Leaf of 10-d-old seedling.

**(B)** Root of 10-d-old seedling.



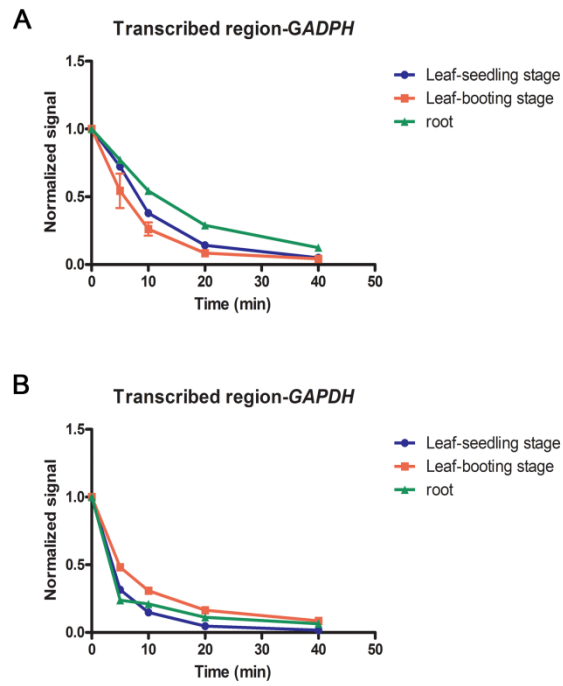

**Fig S8.** Accessibility of transcribed region of *GAPDH*.  
**(A)** Accessibility of transcribed regions to Micrococcal Nuclease.  
**(B)** Accessibility of transcribed regions to Dnase I.

**Table S1.** Primers used for PCR, RT-PCR and real-time RT-PCR analysis.

| <b>Experiment</b>              | <b>Name</b> | <b>Primer sequence (5'-3')</b>  |
|--------------------------------|-------------|---------------------------------|
| genomic PCR                    |             |                                 |
|                                | WLF-B       | TCCCTCCCTCCTCTCCTC              |
|                                | WLF-D       | TCCCTCCGTCCCCTCCTC              |
|                                | WLF1-A      | GCGGAGTAAGTAAGTAAGCAG           |
|                                | F1spAR1-A   | TCCCTATAAGAACGCTACAGAG          |
|                                | F1spAF1-A   | TGTCATGGCATGGCATGCAC            |
|                                | GS2R6       | ATGTTGTTGCCTCCTCGGAATG          |
|                                | GS2F5       | ACCCACAGGCCATATTCAAGG           |
|                                | GS2R4       | AGCCAGCTCCATTCCAGTCA            |
|                                | GS2F2       | TCGAGAGAATCACGGAGCAA            |
|                                | WLR1        | GGTCCTTCATACCTTCAGCG            |
| promoter genomic PCR           |             |                                 |
|                                | GS2-A016 F1 | ACAAACGGAATCTGACTTTGAAAAGTTTGCC |
|                                | GS2-A016 R1 | CGCCGCTGCTTACTTACTTACTC         |
|                                | GS2-B017 F1 | CAAGGTCTGGTAATCCCATGTGTTGTGC    |
|                                | GS2-B017 R1 | CGCCGCTGCTTGCTTACTTACTTACTCC    |
|                                | GS2-D018 F2 | CCTGCTATTGCTTCGGATGA            |
|                                | GS2-D018 R1 | CGCCGCTACTTACTTACTTACTC         |
| RT-PCR                         |             |                                 |
|                                | mGS2-F2     | TCCTCCCTCGTCTCGTCCGCGT          |
|                                | mGS2-R2     | AGTGCCCCGACGGAACCACAGG          |
| <i>TaGS2</i> mutants selection |             |                                 |
|                                | In10F       | TGGCTGCCACACAAATTACAG           |
|                                | In10R       | CCTTCTTGATCACGTGCGAAAC          |
| ChIP                           |             |                                 |
|                                | qPCR-A-F1   | TTGGTTTCTGGACCGGTTTG            |
|                                | qPCR-A-R1   | CAGTGGCATCTGGCTCTTGA            |
|                                | qPCR-A-F2   | GCGTGCTTGTCCGTCTCTCT            |
|                                | qPCR-A-R2   | ATCAGCGAATGAACGCAACA            |
|                                | qPCR-A-F3   | TGCAGGGTTGGAGGATCTG             |
|                                | qPCR-A-R3   | CTATCGAACGCGTACCCTTGA           |
|                                | qPCR-A-F4   | GCCCACAGGCCATATTCAAG            |
|                                | qPCR-A-R4   | AGATGAAAGGTACCAGGATGTTGTT       |
|                                | qPCR-A-F5   | TTTGCGAGTGAGAAACAACAATC         |
|                                | qPCR-A-R5   | ATCTTCGCGCATGCTCAGT             |
|                                | qPCR-A-F6   | ACGCCCTTCACCGACAAG              |
|                                | qPCR-A-R6   | GCGCCTGACGAGAAAACAG             |

---

|           |                          |
|-----------|--------------------------|
| qPCR-B-F1 | CGTCCCCGTCGTTGTCTCT      |
| qPCR-B-R1 | ACGAACAAGCATTGCATCGA     |
| qPCR-B-F2 | GGCTGGGCTGGGTATGG        |
| qPCR-B-R2 | GGCAAAAAACCGTCCAAAGA     |
| qPCR-B-F3 | TCAGAAGCAAATCAAGGGTACTCA |
| qPCR-B-R3 | GCAAACCTATGCATGCAAGGAAA  |
| qPCR-B-F4 | CCCGATAGAGCATCACCTTAATTT |
| qPCR-B-R4 | ACGCATGCTCAATGTGCTACAT   |
| qPCR-B-F5 | CCCTTCACCGACAAGATCATC    |
| qPCR-B-R5 | GGGTCCGCTGACGAGAAAA      |
| qPCR-B-F6 | CATTTGGCCGTGACATTTCA     |
| qPCR-B-R6 | TGATTTCAATTCCGGCGTAAAG   |
| qPCR-D-F1 | CGTCCGCGTCCTTGTCA        |
| qPCR-D-R1 | GAGAATCGAGGAAGCATTGCA    |
| qPCR-D-F2 | GGCAGCCGCATCTTTCAT       |
| qPCR-D-R2 | GCCCAGAATGCACACACATC     |
| qPCR-D-F3 | ATCATCGCCGAGTACATCTGGTA  |
| qPCR-D-R3 | GACGCGTGCGACGAGAA        |
| qPCR-D-F4 | TCATCAAATATCGCCGTTTCC    |
| qPCR-D-R4 | AGTGAAGTCTCATCCCGTAAAA   |
| qPCR-D-F5 | CTGACCGAATGAGCATCCTTTT   |
| qPCR-D-R5 | ACACCAGCTTGCTCCGTGAT     |
| qPCR-D-F6 | GAACCTTTCACTTCGCCATGA    |
| qPCR-D-R6 | TTCACTCGCCATACCCATGA     |

## BSP

|          |                                    |
|----------|------------------------------------|
| BSP-A-F1 | TAGGTTATTAGTGTGGTTGTATTTGTATAAGAAG |
| BSP-A-R1 | TAACCCCRAAACCAATAATTA              |
| BSP-A-F2 | ATGTTGTATTTGATAAAGGGGT             |
| BSP-A-R2 | AATATTCCTTCCCTCTAACTCC             |
| BSP-A-F3 | GTGTGTGTTTTTTTTGGGTAGA             |
| BSP-A-R3 | TAATCAACCAACCAAAAACAAC             |
| BSP-A-F4 | TGTTTTGGTTTGGTTGATTAGT             |
| BSP-A-R4 | ATCAATCAATCTATAAAAACRAAAAT         |
| BSP-B-F1 | TGTATTGTAGTYGGGTTATTGTAG           |
| BSP-B-R1 | TCATCCCCTTTATCAAATACA              |
| BSP-B-F2 | GTATTTGATAAAGGGGATGAAGG            |
| BSP-B-R2 | CCAAAAAAAACACACACATCTC             |
| BSP-B-F3 | GAGATGTGTGTGTTTTTTTTGG             |
| BSP-B-R3 | AACCAAAAACAAAAAAAACAAC             |
| BSP-B-F4 | GTTTTTTTGTGTTTTGGTTGATTAG          |
| BSP-B-R4 | CAATCAATCCATAAAAACRAAC             |
| BSP-D-F1 | GTTTATGTGTGTTGTTGTTGGG             |
| BSP-D-R1 | CAAACCAACCAAAATACAACA              |

---

---

|          |                            |
|----------|----------------------------|
| BSP-D-F2 | TGTTGTATTTGGTTGGGTT        |
| BSP-D-R2 | AATCRCRCTAAAAATATTTATC     |
| BSP-D-F3 | ATATTTGATAAAGGGGATGAAGG    |
| BSP-D-R3 | CAATATATTCCTTATTCCTTCTCTCC |
| BSP-D-F4 | GGAGAGAAGGAATAAGGAATATATTG |
| BSP-D-R4 | CAAAACAAAAAAAACAAAACCA     |
| BSP-D-F5 | TTTTTTGTTGAAGGTTTGGAG      |
| BSP-D-R5 | TAAAAATCAATCCATCAATCCA     |

#### TaqMan absolute quantification real-time RT-PCR

|          |                                   |
|----------|-----------------------------------|
| tubb2-F  | ATGGTTCTTGACAACGAGGCT             |
| tubb2-R  | AGGCGAGGGAATGGGATAA               |
| tubb2-P  | ATCTGTTTCAGGACTCTTAAGCTGACCACAC   |
| TaGS2A-F | ACAAGATCATCGCCGAGTACATCTG         |
| TaGS2A-R | ACTGTCTTCTCCAGGAGCCTGCCCCG        |
| TaGS2A-P | CCCGTCAGAGCTACCCAAATGGAATTATGAC   |
| TaGS2B-F | ACAAGATCATCGCCGAGTACATCTG         |
| TaGS2B-R | ACTGTCTTCTCCAGGAGCCTGGCCT         |
| TaGS2B-P | CCCGTCAGAGCTACCGAAATGGAAGTACGAT   |
| TaGS2D-F | AGTACATCTGGGTTGGAGGATCTGG         |
| TaGS2D-R | TGTGCTCGATCCGTCGTAGTT             |
| TaGS2D-P | CCTCAGGAGCAAATCAAGGACGATTTCAAAGCC |

#### SYBR relative quantification real-time RT-PCR

|         |                      |
|---------|----------------------|
| qGS2-F1 | CCGAGACCACGATCCTGT   |
| qGS2-R1 | GGTCCTTCATACCTTCAGCG |

#### Enzyme accessibility assay

|          |                      |
|----------|----------------------|
| qGAPDH-F | TTAGACTTGCGAAGCCAGCA |
| qGAPDH-R | AAATGCCCTTGAGGTTTCCC |

---

\*R: A or G; Y: C or T
